# Supplementary material for: Single-shot Ad26 vaccine protects against SARS-CoV-2 in rhesus macaques
Source: Springer Nature journal article supplement (doi:10.1038/s41586-020-2607-z), 2020-07-30
Supplement: 41586_2020_2607_MOESM1_ESM.pdf [file 41586_2020_2607_MOESM1_ESM.pdf]

---

**Supplementary information**

---

**Single-shot Ad26 vaccine protects against SARS-CoV-2 in rhesus macaques**

---

In the format provided by the authors and unedited

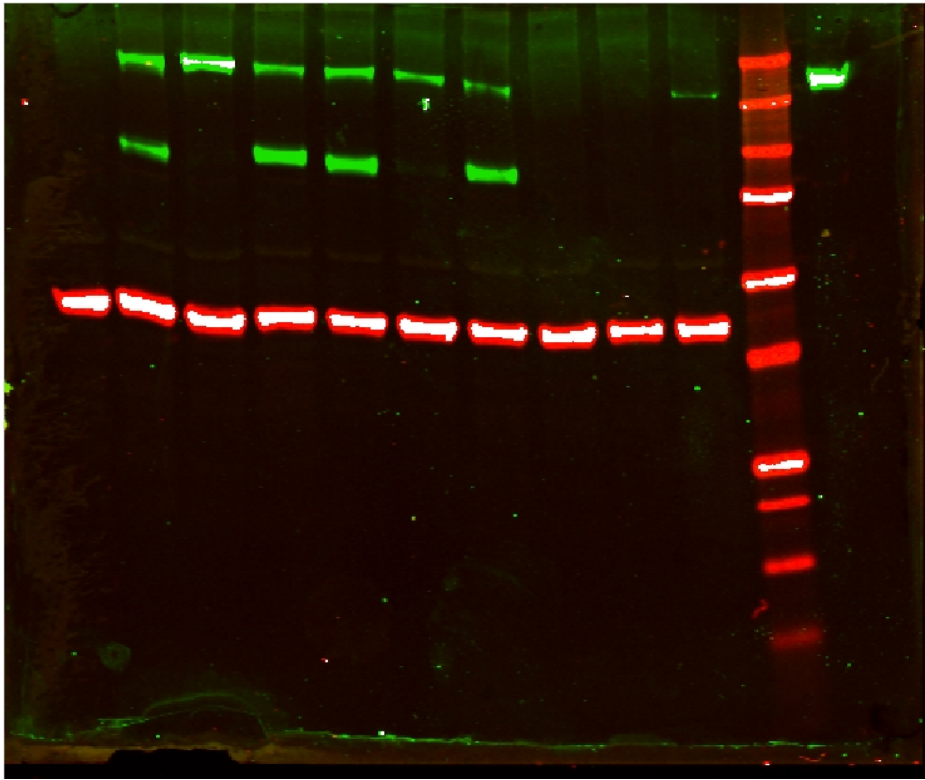

- 1 **Ad26.Empty**
- 2 **tPA.S**
- 3 **tPA.S.PP**
- 4 **S**
- 5 **S.dCT**
- 6 Non-relevant sample
- 7 **tPA.WT.S**
- 8 Non-relevant sample
- 9 Non-relevant sample
- 10 **S.dTM.PP**
- 11 Marker
- 12 Non-relevant sample

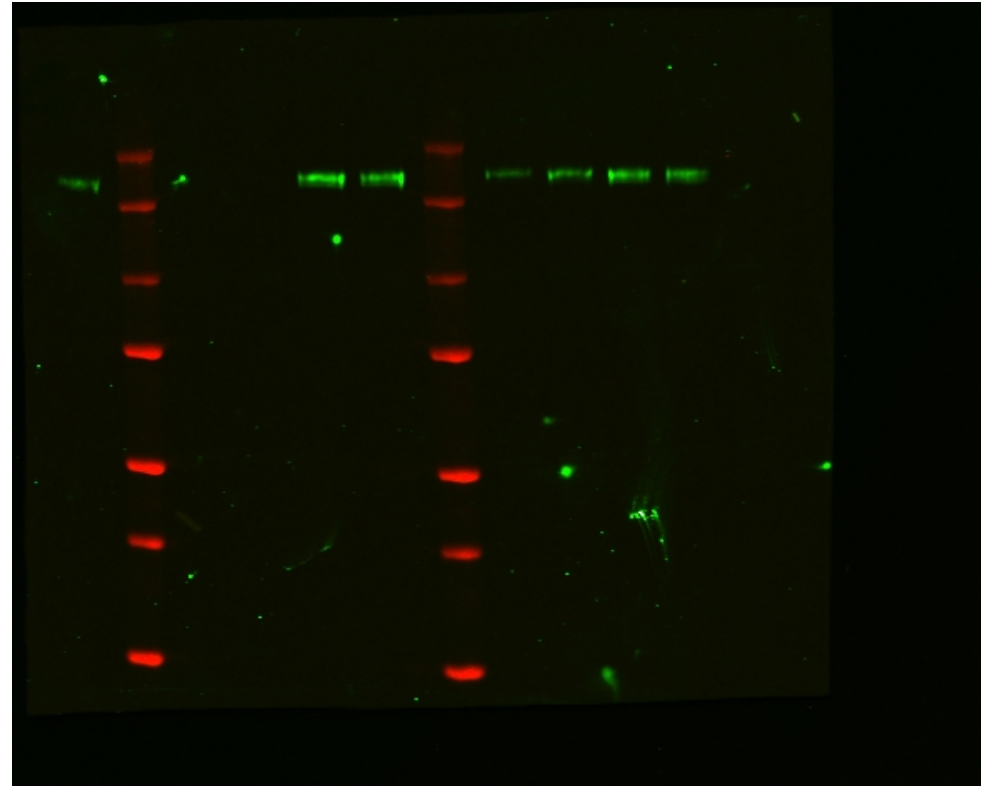

1. Non-relevant sample
2. Marker
3. Non-relevant sample
4. **Ad26.Empty**
5. Non-relevant sample
6. **S.PP**
7. **Marker**
8. Non-relevant sample
9. Non-relevant sample
10. Non-relevant sample
11. Non-relevant sample
12. Non-relevant sample
